# Supplementary material
Source: publisher figshare collection journal article supplement (https://tandf.figshare.com/articles/dataset/_/11567379)
Supplement: Supplementary file 1 [file 1]

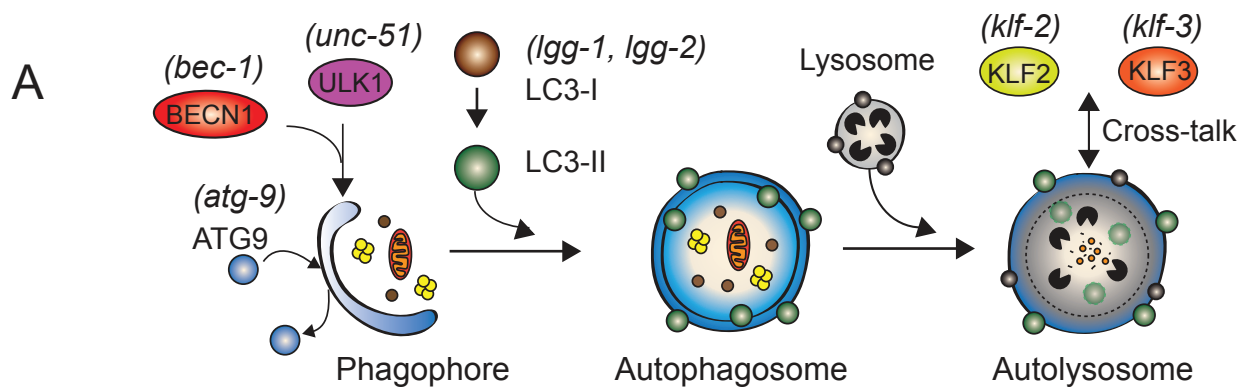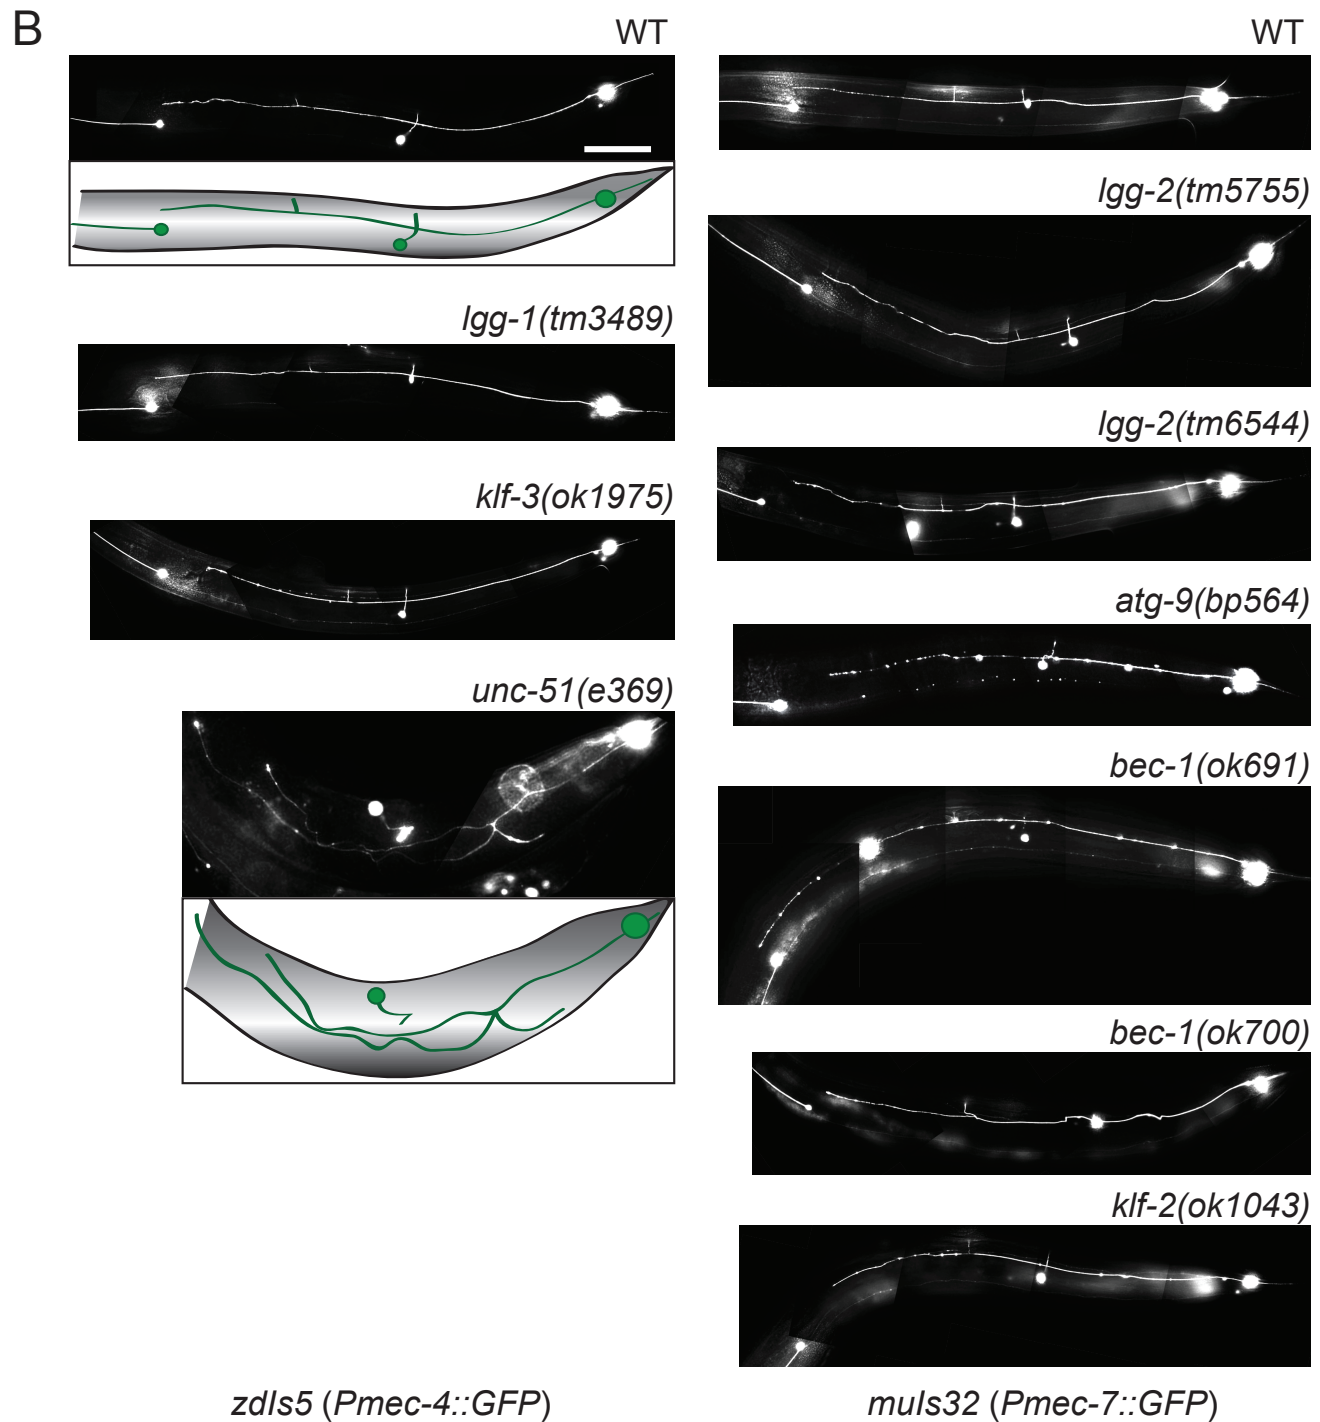

Figure S1

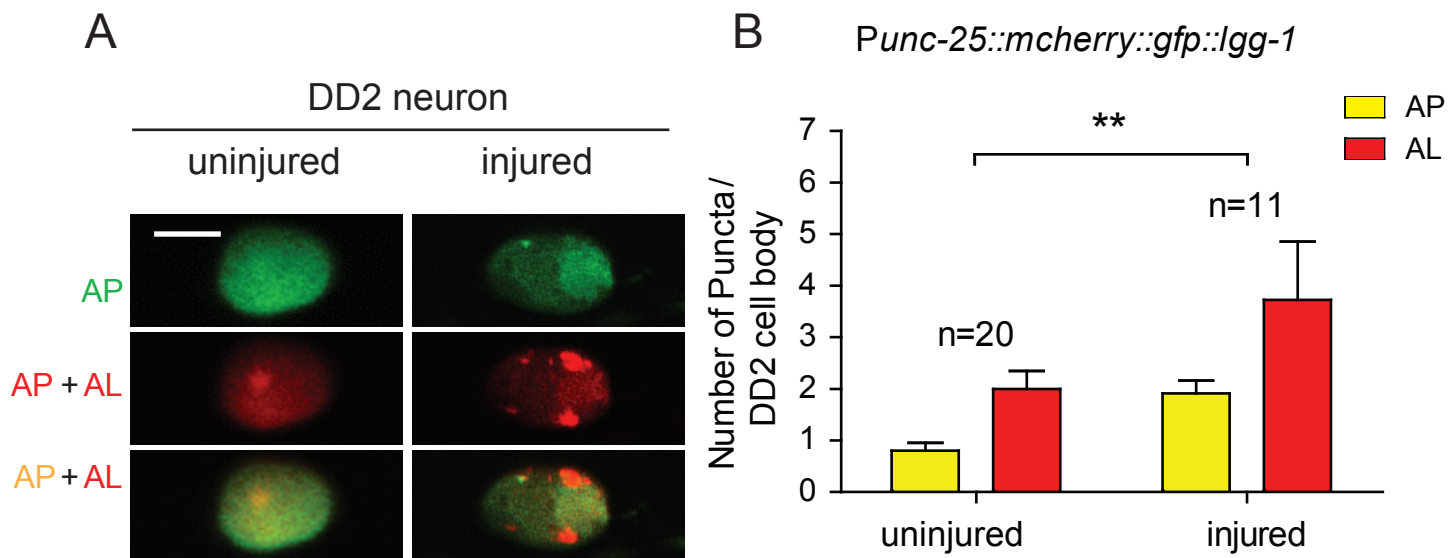

Figure S2

|                   |                                            |            |
|-------------------|--------------------------------------------|------------|
| Human             | <b>T N V F N A T F H I W H S G Q F G T</b> | aa 267-284 |
| Mouse             | <b>T N V F N A T F H I W H S G Q F G T</b> | aa 265-282 |
| Frog              | <b>T N V F N A T F H I W H S G Q F G T</b> | aa 262-279 |
| Lancelet          | <b>T N V F N A T F H I W H S G H F G T</b> | aa 299-316 |
| Anemone           | <b>T N V F N S T F H I W H N G H F G T</b> | aa 273-290 |
| Fly               | <b>T N I F N I T F H I W H A G H F G T</b> | aa 243-260 |
| <i>C. elegans</i> | <b>T N V L N L C F H I W V D G I V G E</b> | aa 196-213 |
| Scrambled         | <b>H D L L C I D T V I G F V G E V W N</b> |            |

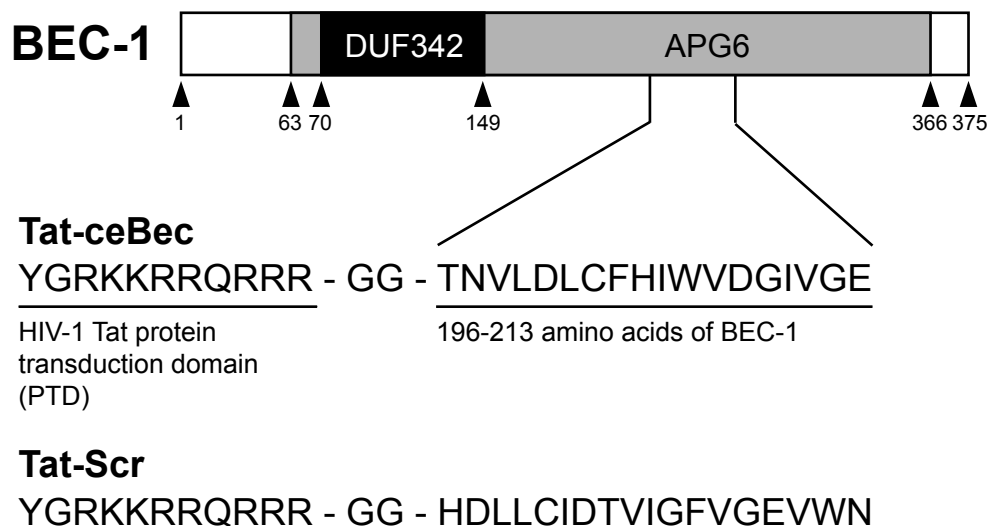

Figure S3

DLK-1 Endogenous level  
(*Pdlk-1-GFP::DLK-1 MosSCI*)

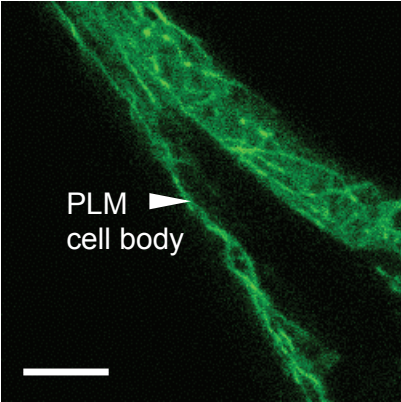

*Pmec-4-mKate2*

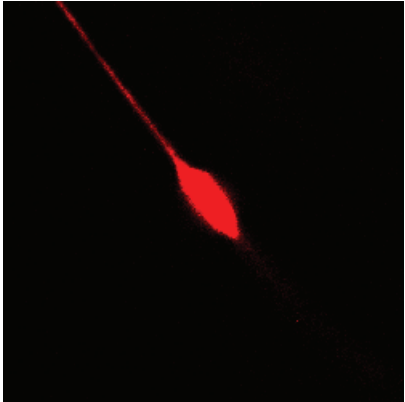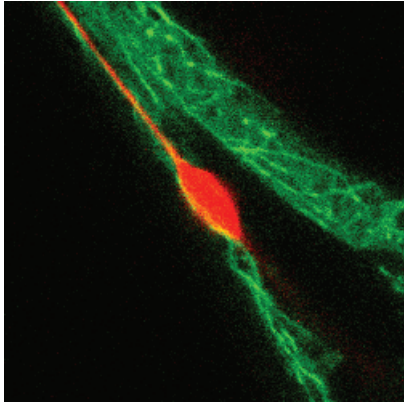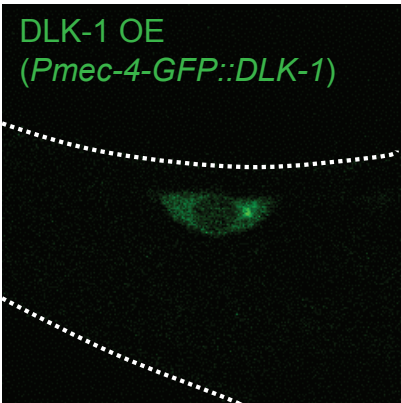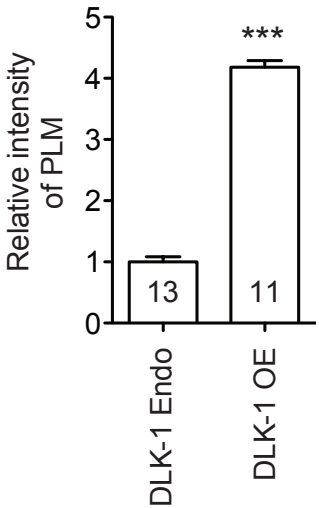

Figure S4



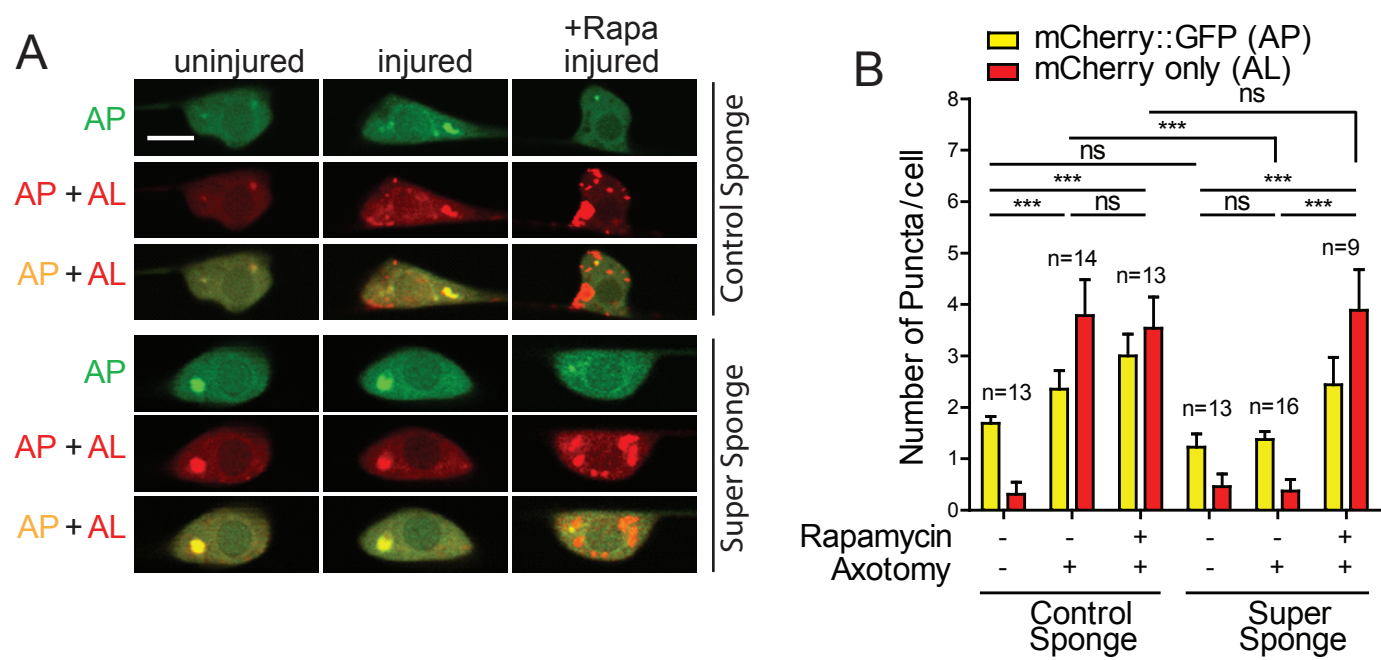

Figure S5

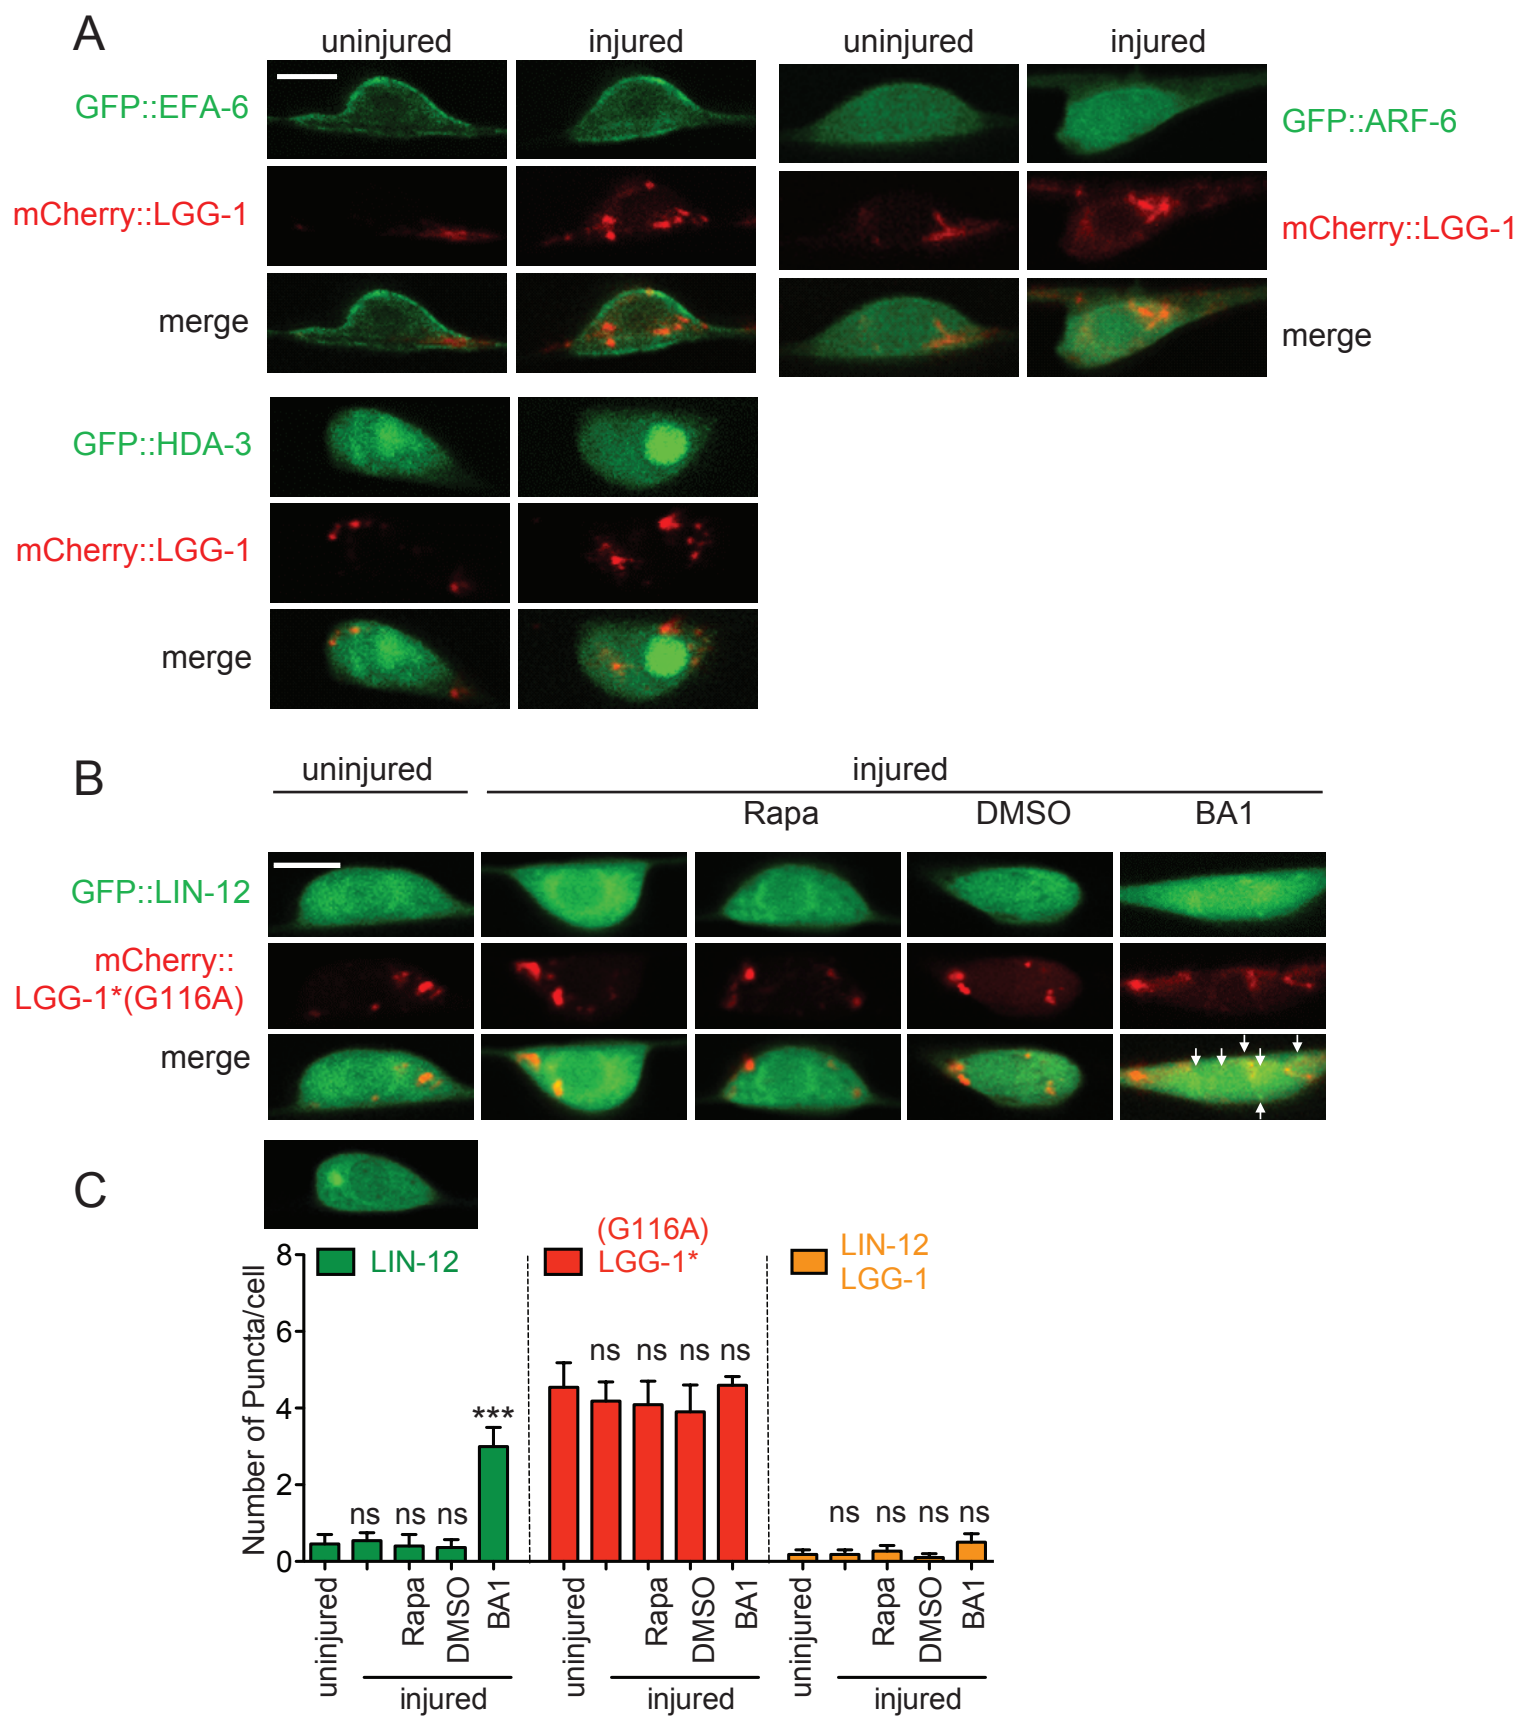

Figure S6

LIN-12 Endogenous level  
(*Plin-12-GFP::LIN-12 MosSCI*)

*Pmec-4-mKate2*

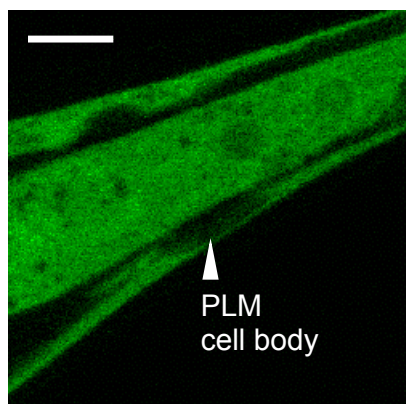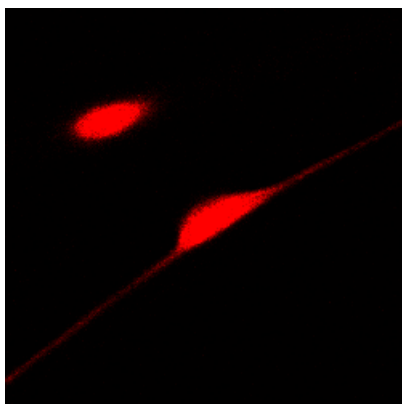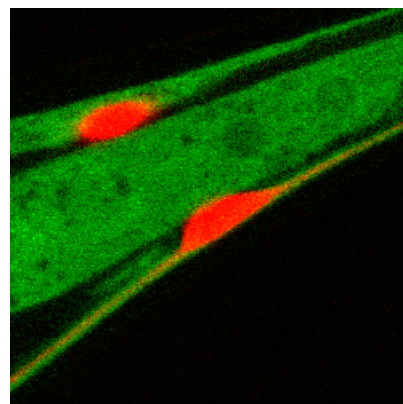

LIN-12 OE  
(*Pmec-4-GFP::LIN-12*)

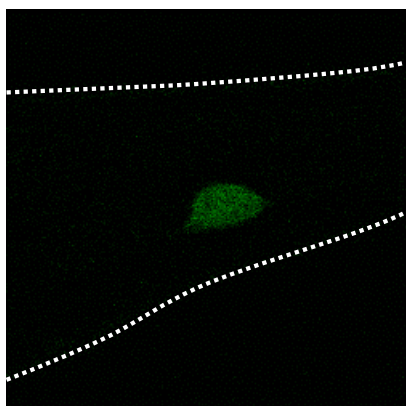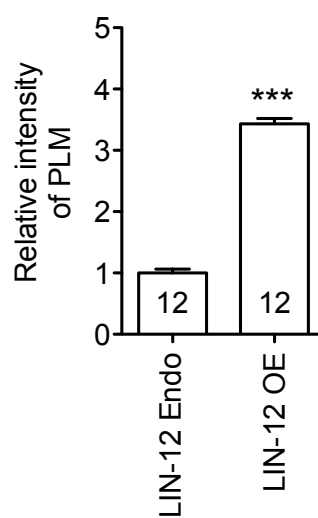

Figure S7
